# Supplementary material
Source: Springer Nature journal article supplement (https://www.springermedizin.de/resource/supplementary/12880_2013_207_MOESM1_ESM.pdf/9450224)
Supplement: MOESM1 [file 9450224]

194 Patients  
Gd-EOB-DTPA  
MRI

excluded:  
missing follow up examination,  
disseminated liver metastases, portal  
vein thrombosis, peritoneal  
carcinomatosis, TACE,  
hemosiderosis/hemochromatosis,  
local lymph node metastases  
(n = 110)

malignant  
lesions  
(n = 64)

benign lesions  
(n = 20)

HCC  
(n = 34)

metastases  
(n = 30)

FNH  
(n = 14)

hemangioma  
(n = 3)

adenoma  
(n = 3)

resection  
(n = 5)

resection  
(n = 8)

follow up  
examination > 6  
months

follow up  
examination > 6  
months

follow up  
examination > 6  
months

biopsy  
(n = 24)

biopsy  
(n = 8)

AFP > 196 ng/ml  
(n = 5)

primary tumor  
(n = 14)
